# Supplementary material for: Long term 5G network traffic forecasting via modeling non-stationarity with deep learning
Source: Springer Nature journal article supplement (doi:10.1038/s44172-023-00081-4), 2023-06-06
Supplement: 44172_2023_81_MOESM3_ESM.pdf [file 44172_2023_81_MOESM3_ESM.pdf]

# Description of Additional Supplementary File

**File name:** Supplementary Data 1

**Description:**

Supplementary Data 1 summarizes all experimental results of the proposed Diviner compared with the time series prediction based baseline models on NPT benchmark.

**File name:** Supplementary Data 2

**Description:**

Supplementary Data 2 summarizes all experimental results of the proposed Diviner compared with the time series prediction based baseline models on other real world benchmarks.
